# Supplementary material for: Layered structure-induced quenching delay toward highly efficient and thermally stable red emission in Eu3+-activated borotellurate phosphors
Source: Royal Society of Chemistry journal article supplement (doi:10.1039/d3tc04320g), 2024-01-01
Supplement: d3tc04320g1.pdf [file d3tc04320g1.pdf]

## Supporting information

### **Layered structure-induced quenching delay toward highly efficient and thermally stable red emission in Eu<sup>3+</sup>-activated borotellurate phosphor**

Yuefei Xiang,<sup>a</sup> Hongzhi Zhang,<sup>\*b</sup> JunPeng Li,<sup>a</sup> Hong Li,<sup>a</sup> Tongsheng Yang,<sup>a</sup> Canyuan

Liao,<sup>a</sup> Heyun Zhao,<sup>b</sup> Jing Zhu<sup>\*a</sup>

<sup>a</sup> *Yunnan Key Laboratory of Carbon Neutrality and Green Low-carbon Technologies,  
School of Materials and Energy, Yunnan University, Kunming 650091, China*

<sup>b</sup> *Yunnan Key Laboratory of Electromagnetic Materials and Devices, National Center  
for International Research on Photoelectric and Energy Materials, School of  
Materials and Energy, Yunnan University, Kunming 650091, China*

---

\* Corresponding author.

E-mail addresses: jzhu@ynu.edu.cn (J. Zhu); zhanghz@ynu.edu.cn (H. Z. Zhang).

**Table S1** Rietveld refinement results of the NYTB: $x\text{Eu}^{3+}$  samples.

| Sample    | Space group        | Cell parameters (Å),<br>Cell Volume (Å <sup>3</sup> )               | $R_{\text{wp}}$ , $R_{\text{p}}$ , $\chi^2$ |
|-----------|--------------------|---------------------------------------------------------------------|---------------------------------------------|
| $x = 0$   | P2 <sub>1</sub> /c | $a = 6.309730$<br>$b = 9.934610$<br>$c = 6.730189$<br>$V = 408.944$ | 6.19%, 4.68%, 0.65                          |
| $x = 0.1$ | P2 <sub>1</sub> /c | $a = 6.313962$<br>$b = 9.946430$<br>$c = 6.736743$<br>$V = 410.052$ | 8.39%, 6.39%, 0.96                          |
| $x = 0.2$ | P2 <sub>1</sub> /c | $a = 6.316231$<br>$b = 9.952826$<br>$c = 6.741315$<br>$V = 410.695$ | 9.25%, 6.99%, 1.14                          |
| $x = 0.3$ | P2 <sub>1</sub> /c | $a = 6.317928$<br>$b = 9.961890$<br>$c = 6.746250$<br>$V = 411.434$ | 9.30%, 6.86%, 1.10                          |
| $x = 0.4$ | P2 <sub>1</sub> /c | $a = 6.318399$<br>$b = 9.973191$<br>$c = 6.751103$<br>$V = 412.137$ | 9.32%, 6.82%, 1.07                          |
| $x = 0.5$ | P2 <sub>1</sub> /c | $a = 6.320568$<br>$b = 9.978502$<br>$c = 6.753164$<br>$V = 412.576$ | 9.75%, 7.03%, 0.99                          |
| $x = 0.6$ | P2 <sub>1</sub> /c | $a = 6.322726$<br>$b = 9.985598$<br>$c = 6.757085$<br>$V = 413.266$ | 9.92%, 7.41%, 1.05                          |
| $x = 0.7$ | P2 <sub>1</sub> /c | $a = 6.324495$<br>$b = 9.989513$<br>$c = 6.671006$<br>$V = 413.723$ | 9.35%, 6.76%, 1.07                          |

**Table S2** Atomic coordinates, occupation factors and displacement parameters of NYTB: $x\text{Eu}^{3+}$  samples.

| Atom      | Wyck. | $x/a$   | $y/b$   | $z/c$   | Occ. | $U_{\text{iso}} (\text{\AA}^2)$ |
|-----------|-------|---------|---------|---------|------|---------------------------------|
| $x = 0$   |       |         |         |         |      |                                 |
| Na        | 4e    | -0.4159 | 0.6108  | 0.166   | 1    | 0.01007                         |
| Y         | 4e    | 0.1267  | 0.8337  | 0.0239  | 1    | 0.00993                         |
| Te        | 2c    | 0.0000  | 0.5000  | 0.0000  | 1    | 0.01085                         |
| B         | 4e    | 0.3364  | 0.3996  | 0.3711  | 1    | 0.0086                          |
| O1        | 4e    | 0.481   | 0.8267  | 0.0561  | 1    | 0.02485                         |
| O2        | 4e    | -0.0049 | 0.6494  | 0.176   | 1    | 0.0097                          |
| O3        | 4e    | 0.2891  | 0.4386  | 0.1636  | 1    | 0.02152                         |
| O4        | 4e    | -0.1998 | 0.9377  | 0.0083  | 1    | 0.02457                         |
| O5        | 4e    | -0.1622 | 0.3855  | 0.1338  | 1    | 0.00804                         |
| $x = 0.1$ |       |         |         |         |      |                                 |
| Na        | 4e    | -0.4159 | 0.6108  | 0.166   | 1    | 0.01144                         |
| Y         | 4e    | 0.1295  | 0.8339  | 0.02389 | 0.95 | 0.00937                         |
| Eu        | 4e    | 0.1295  | 0.8339  | 0.02389 | 0.05 | 0.00937                         |
| Te        | 2c    | 0       | 0.5     | 0       | 1    | 0.00397                         |
| B         | 4e    | 0.3364  | 0.3996  | 0.3711  | 1    | 0.02433                         |
| O1        | 4e    | 0.481   | 0.8267  | 0.0561  | 1    | 0.02615                         |
| O2        | 4e    | -0.0049 | 0.6494  | 0.176   | 1    | 0.01264                         |
| O3        | 4e    | 0.2891  | 0.4386  | 0.1636  | 1    | 0.01115                         |
| O4        | 4e    | -0.1998 | 0.9377  | 0.0083  | 1    | 0.02262                         |
| O5        | 4e    | -0.1622 | 0.3855  | 0.1338  | 1    | 0.01388                         |
| $x = 0.2$ |       |         |         |         |      |                                 |
| Na        | Na    | -0.4159 | 0.6108  | 0.166   | 1    | 0.02756                         |
| Y         | Y     | 0.12932 | 0.83357 | 0.02356 | 0.9  | 0.00753                         |
| Eu        | Eu    | 0.12932 | 0.83357 | 0.02356 | 0.1  | 0.00753                         |
| Te        | Te    | 0       | 0.5     | 0       | 1    | 0.03944                         |
| B         | B     | 0.3364  | 0.3996  | 0.3711  | 1    | 0.0292                          |
| O1        | O1    | 0.481   | 0.8267  | 0.0561  | 1    | 0.03414                         |
| O2        | O2    | -0.0049 | 0.6494  | 0.176   | 1    | 0.08953                         |
| O3        | O3    | 0.2891  | 0.4386  | 0.1636  | 1    | 0.10385                         |
| O4        | O4    | -0.1998 | 0.9377  | 0.0083  | 1    | 0.09276                         |
| O5        | 4e    | -0.1622 | 0.3855  | 0.1338  | 1    | 0.04774                         |
| $x = 0.3$ |       |         |         |         |      |                                 |
| Na        | Na    | -0.4159 | 0.6108  | 0.166   | 1    | 0.00918                         |
| Y         | Y     | 0.12706 | 0.83391 | 0.02114 | 0.85 | 0.00475                         |
| Eu        | Eu    | 0.12706 | 0.83391 | 0.02114 | 0.15 | 0.00475                         |
| Te        | Te    | 0       | 0.5     | 0       | 1    | 0.00178                         |
| B         | B     | 0.3364  | 0.3996  | 0.3711  | 1    | 0.0086                          |

|                       |    |         |         |         |      |         |
|-----------------------|----|---------|---------|---------|------|---------|
| O1                    | O1 | 0.481   | 0.8267  | 0.0561  | 1    | 0.0125  |
| O2                    | O2 | -0.0049 | 0.6494  | 0.176   | 1    | 0.0097  |
| O3                    | O3 | 0.2891  | 0.4386  | 0.1636  | 1    | 0.0125  |
| O4                    | O4 | -0.1998 | 0.9377  | 0.0083  | 1    | 0.0104  |
| O5                    | 4e | -0.1622 | 0.3855  | 0.1338  | 1    | 0.0098  |
| <hr/> $x = 0.4$ <hr/> |    |         |         |         |      |         |
| Na                    | Na | -0.4159 | 0.6108  | 0.166   | 1    | 0.0104  |
| Y                     | Y  | 0.12763 | 0.83378 | 0.02269 | 0.8  | 0.00428 |
| Eu                    | Eu | 0.12763 | 0.83378 | 0.02269 | 0.2  | 0.00428 |
| Te                    | Te | 0       | 0.5     | 0       | 1    | 0.00599 |
| B                     | B  | 0.3364  | 0.3996  | 0.3711  | 1    | 0.0086  |
| O1                    | O1 | 0.481   | 0.8267  | 0.0561  | 1    | 0.0124  |
| O2                    | O2 | -0.0049 | 0.6494  | 0.176   | 1    | 0.0115  |
| O3                    | O3 | 0.2891  | 0.4386  | 0.1636  | 1    | 0.0107  |
| O4                    | O4 | -0.1998 | 0.9377  | 0.0083  | 1    | 0.0137  |
| O5                    | 4e | -0.1622 | 0.3855  | 0.1338  | 1    | 0.0066  |
| <hr/> $x = 0.5$ <hr/> |    |         |         |         |      |         |
| Na                    | 4e | -0.4159 | 0.6108  | 0.166   | 1    | 0.02529 |
| Y                     | 4e | 0.12569 | 0.83283 | 0.02129 | 0.75 | 0.00406 |
| Eu                    | 4e | 0.12569 | 0.83283 | 0.02129 | 0.25 | 0.00406 |
| Te                    | 2c | 0       | 0.5     | 0       | 1    | 0.0048  |
| B                     | 4e | 0.3364  | 0.3996  | 0.3711  | 1    | 0.0086  |
| O1                    | 4e | 0.481   | 0.8267  | 0.0561  | 1    | 0.0125  |
| O2                    | 4e | -0.0049 | 0.6494  | 0.176   | 1    | 0.0097  |
| O3                    | 4e | 0.2891  | 0.4386  | 0.1636  | 1    | 0.0125  |
| O4                    | 4e | -0.1998 | 0.9377  | 0.0083  | 1    | 0.0104  |
| O5                    | 4e | -0.1622 | 0.3855  | 0.1338  | 1    | 0.0098  |
| <hr/> $x = 0.6$ <hr/> |    |         |         |         |      |         |
| Na                    | 4e | -0.4159 | 0.6108  | 0.166   | 1    | 0.04069 |
| Y                     | 4e | 0.12397 | 0.83475 | 0.02104 | 0.7  | 0.00356 |
| Eu                    | 4e | 0.12397 | 0.83475 | 0.02104 | 0.3  | 0.00356 |
| Te                    | 2c | 0       | 0.5     | 0       | 1    | 0.01397 |
| B                     | 4e | 0.3364  | 0.3996  | 0.3711  | 1    | 0.12041 |
| O1                    | 4e | 0.481   | 0.8267  | 0.0561  | 1    | 0.01081 |
| O2                    | 4e | -0.0049 | 0.6494  | 0.176   | 1    | 0.00819 |
| O3                    | 4e | 0.2891  | 0.4386  | 0.1636  | 1    | 0.8     |
| O4                    | 4e | -0.1998 | 0.9377  | 0.0083  | 1    | 0.07474 |
| O5                    | 4e | -0.1622 | 0.3855  | 0.1338  | 1    | 0.02324 |
| <hr/> $x = 0.7$ <hr/> |    |         |         |         |      |         |
| Na                    | 4e | -0.4159 | 0.6108  | 0.166   | 1    | 0.02256 |
| Y                     | 4e | 0.12787 | 0.83327 | 0.02374 | 0.65 | 0.0034  |
| Eu                    | 4e | 0.12787 | 0.83327 | 0.02374 | 0.35 | 0.0034  |
| Te                    | 2c | 0       | 0.5     | 0       | 1    | 0.0137  |
| B                     | 4e | 0.3364  | 0.3996  | 0.3711  | 1    | 0.02796 |

|    |    |         |        |        |   |         |
|----|----|---------|--------|--------|---|---------|
| O1 | 4e | 0.481   | 0.8267 | 0.0561 | 1 | 0.021   |
| O2 | 4e | -0.0049 | 0.6494 | 0.176  | 1 | 0.02035 |
| O3 | 4e | 0.2891  | 0.4386 | 0.1636 | 1 | 0.0458  |
| O4 | 4e | -0.1998 | 0.9377 | 0.0083 | 1 | 0.02778 |
| O5 | 4e | -0.1622 | 0.3855 | 0.1338 | 1 | 0.01805 |

**Table S3** Chromaticity coordinates and color purity (CP) for NYTB: $x\text{Eu}^{3+}$  ( $x = 0.1-0.7$ ).

| $x$ | Coordinates (x, y) | CP (%) |
|-----|--------------------|--------|
| 0.1 | (0.6650, 0.3343)   | 96.7   |
| 0.2 | (0.6649, 0.3343)   | 96.7   |
| 0.3 | (0.6646, 0.3346)   | 96.6   |
| 0.4 | (0.6653, 0.3340)   | 96.8   |
| 0.5 | (0.6662, 0.3332)   | 97.0   |
| 0.6 | (0.6657, 0.3338)   | 96.9   |
| 0.7 | (0.6659, 0.3336)   | 96.9   |

**Table S4** Chromaticity parameters of the fabricated w-LED as a function of driving current.

| Current (mA) | Coordinates (x,y) | CCT (K) | $R_a$ |
|--------------|-------------------|---------|-------|
| 20           | (0.3791,0.3810)   | 4068    | 83.0  |
| 40           | (0.3784,0.3794)   | 4075    | 82.7  |
| 60           | (0.3778,0.3791)   | 4090    | 82.8  |
| 80           | (0.3774,0.3783)   | 4094    | 82.9  |
| 100          | (0.3765,0.3770)   | 4111    | 82.6  |
| 140          | (0.3753,0.3754)   | 4133    | 82.7  |
| 180          | (0.3746,0.3739)   | 4145    | 82.2  |
| 220          | (0.3741,0.3723)   | 4145    | 82.0  |
| 260          | (0.3738,0.3705)   | 4142    | 82.0  |
| 300          | (0.3734,0.3674)   | 4132    | 81.4  |

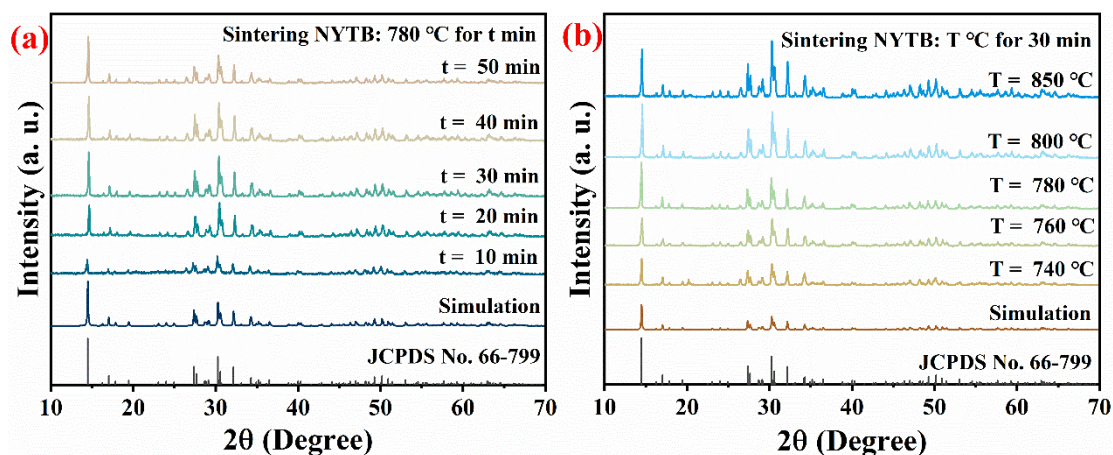

Fig. S1 XRD patterns of the NYTB host (a) sintered at 780 °C with different times and (b) sintered at different temperatures for 30 min.

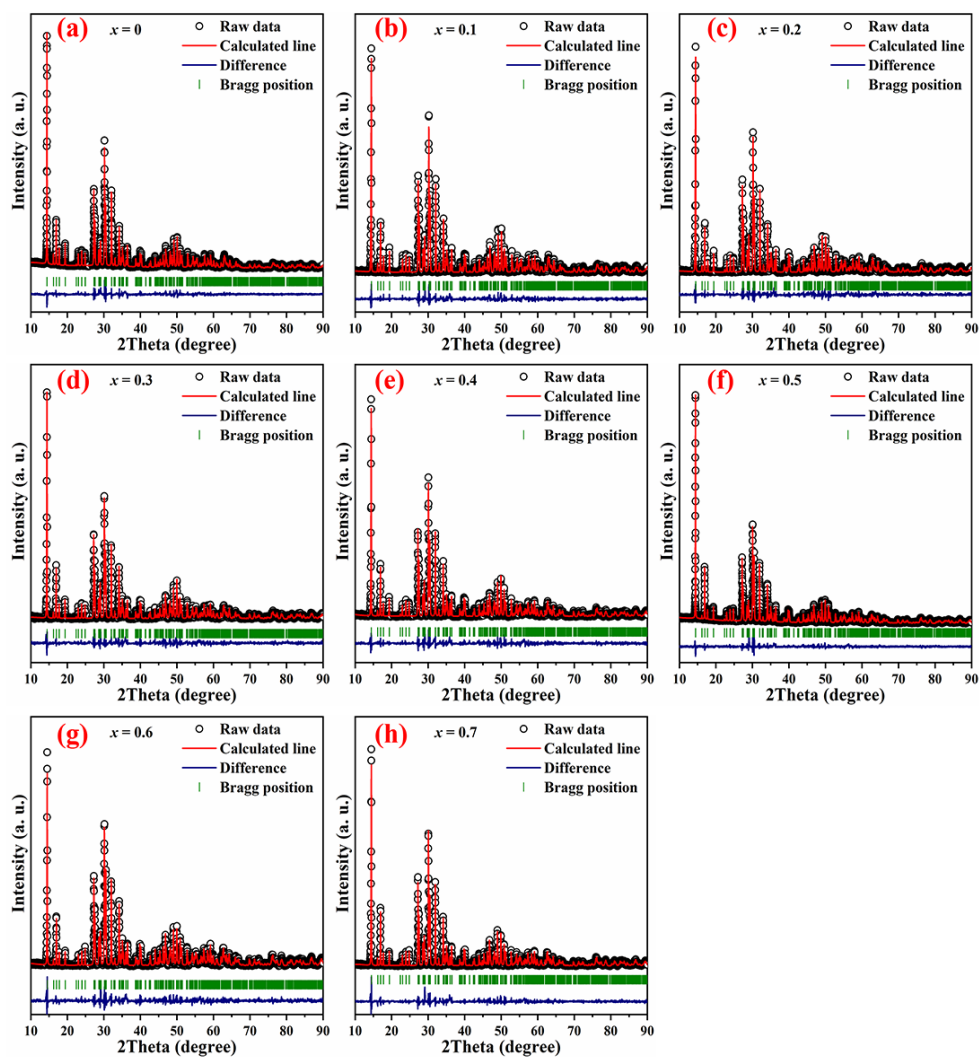

Fig. S2 Rietveld XRD refinements for NYTB: $x\text{Eu}^{3+}$  ( $x = 0-0.7$ ).

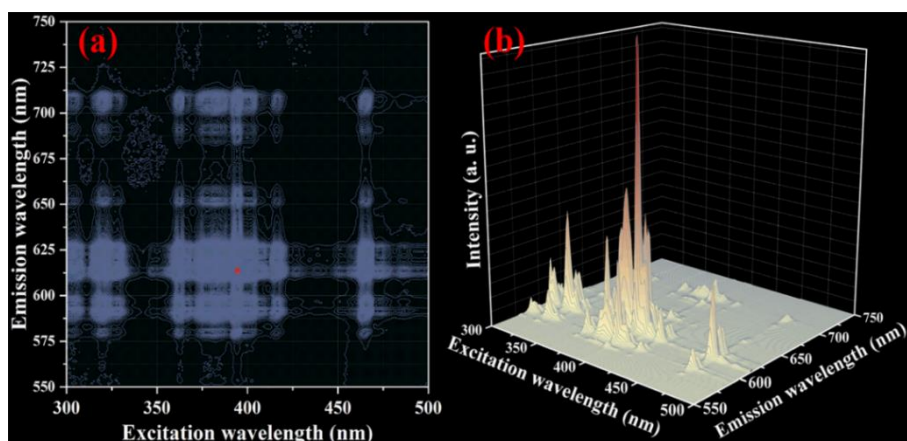

**Fig. S3** (a) Contour line and (b) 3D PL spectra of NYTb:0.5Eu<sup>3+</sup> under various excitation wavelengths.

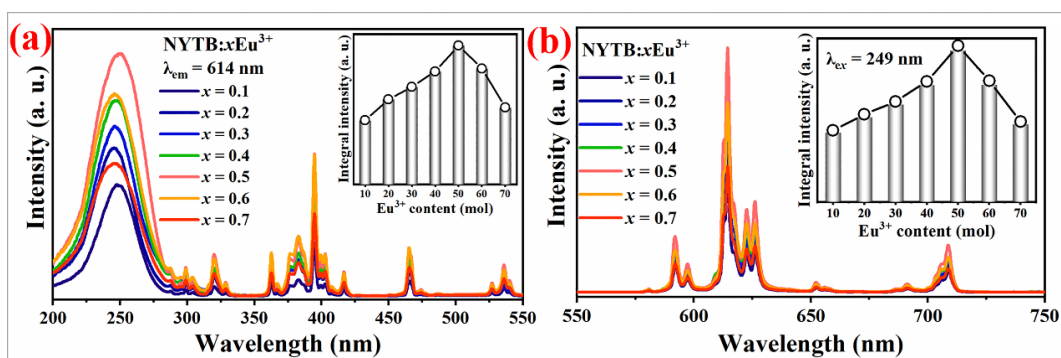

**Fig. S4** (a) PLE spectra and (b) PL emission spectra of NYTb:xEu<sup>3+</sup> (Inset shows integral intensity in response to the Eu<sup>3+</sup> concentration).

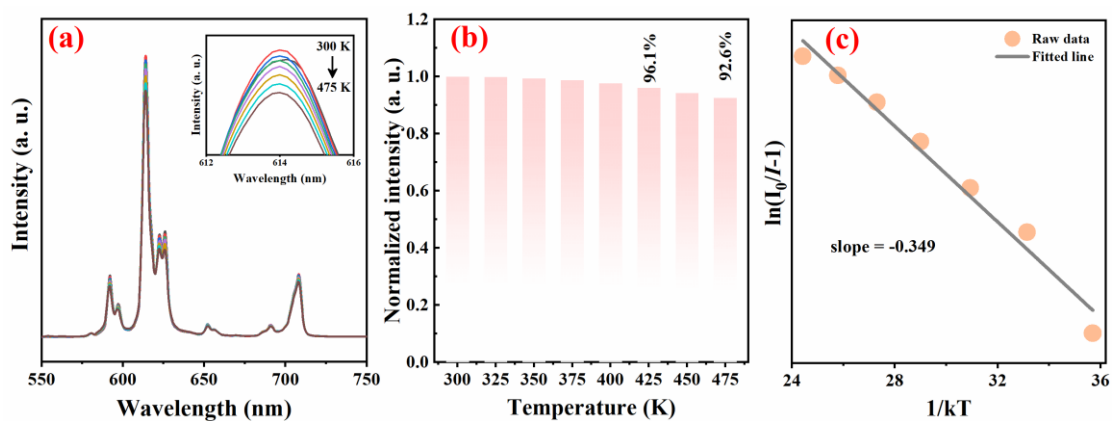

**Fig. S5** (a) Temperature-dependent PL of NYTb:0.4Eu<sup>3+</sup>. (b) Normalized intensity as a function of temperature. (c) Plot of  $1/kT$  versus  $\ln(I_0/I-1)$ .

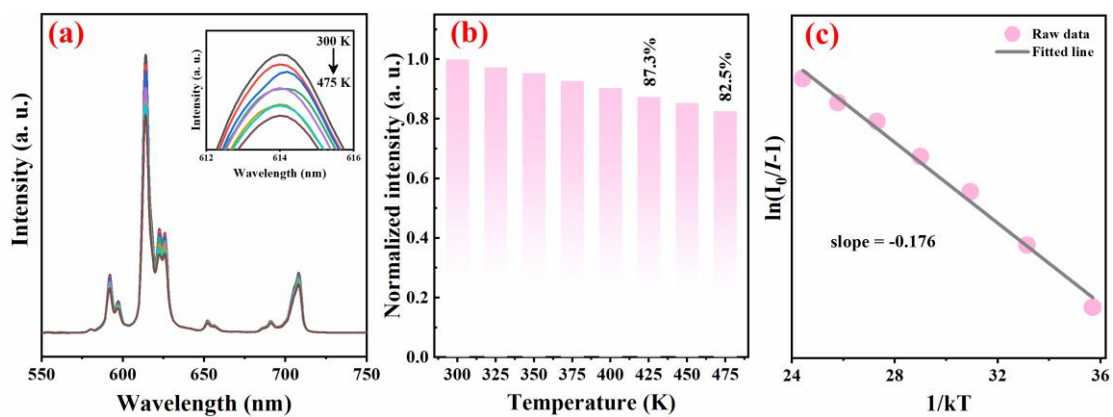

**Fig. S6** (a) Temperature-dependent PL of NYTB:0.6Eu<sup>3+</sup>. (b) Normalized intensity as a function of temperature. (c) Plot of  $1/kT$  versus  $\ln(I_0/I-1)$ .

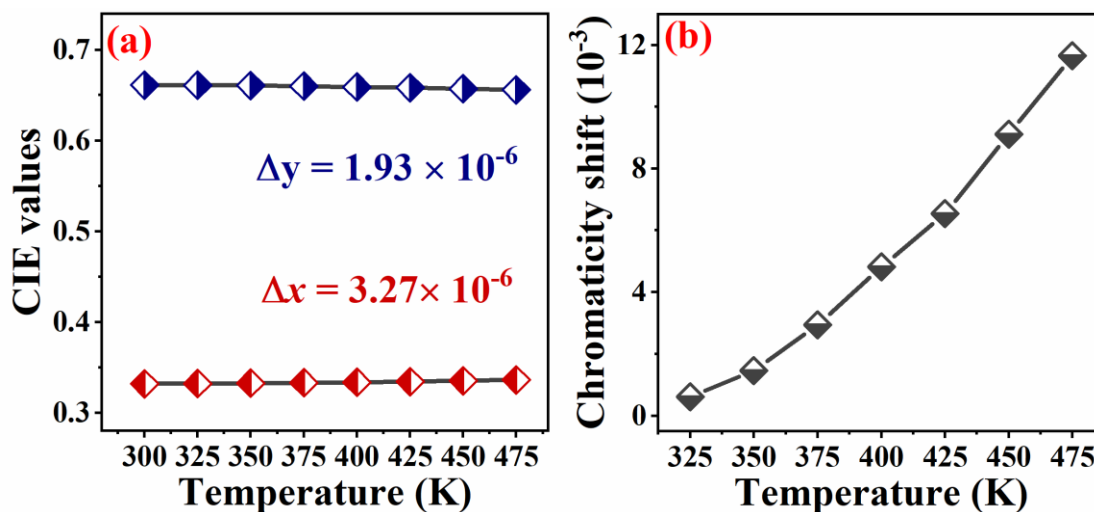

**Fig. S7** (a) Temperature-dependent CIE (x, y) values and (b) Temperature-dependent chromaticity shift.



**Formula S1:**

The  $E_g$  values of the NYTB: $x\text{Eu}^{3+}$  ( $x = 0$  and  $0.5$ ) samples are estimated by the Tauc relation:<sup>1</sup>

$$[F(R)h\nu]^{1/n} = A(h\nu - E_g) \quad (\text{S1})$$

where  $R$ ,  $A$ , and  $h\nu$  represent reflectance, absorption, and photon energy, respectively.

The  $n$  values of  $1/2$  and  $2$  correspond to direct and indirect allowed transitions, separately. The NYTB host belongs to an indirect-gap crystal, indicating that the  $n$  value is  $2$ .

**Formula S2:**

Based on Ozawa's theory, the initial quenching concentration is estimated by  $1/(1+z)$ , in which  $z$  is the number of closest cations around luminescence centers. The emission intensity ( $I$ ) and doping concentration ( $x$ ) can be determined by the following formula:<sup>2</sup>

$$\ln\left(\frac{I}{x}\right) = z \ln(1-x)C \quad (\text{S2})$$

where  $C$  is a constant. The value of  $z$  can be achieved by the slope of  $\ln(I/x)$  vs  $\ln(1-x)$ .

**Formula S3:**

The critical concentration distance ( $R_c$ ) is estimated by the following expression:<sup>3</sup>

$$R_c = 2\left[\frac{3V}{4\pi x_c Z}\right]^{1/3} \quad (\text{S3})$$

where  $V$ ,  $Z$ , and  $x_c$  represent the unit cell volume, the number of dopant effective sites in the unit cell, and the critical concentration of  $\text{Eu}^{3+}$  ( $V = 412.576 \text{ \AA}^3$ ,  $Z = 4$ , and  $x_c = 0.5$ ), respectively.

**Formula S4:**

To investigate the EM process between  $\text{Eu}^{3+}$  ions, the Dexter theory is employed:<sup>4</sup>

$$\frac{I}{x} = K[1 + \beta(x)^{\theta/3}]^{-1} \quad (\text{S4})$$

where  $I$  and  $x$  represent the PL intensity and content of  $\text{Eu}^{3+}$  ions, respectively.  $K$  and  $\beta$  are constants. The type of electric multipolar interaction is reflected by the value of  $\theta = 6, 8,$  and  $10$ , corresponding to the dipole–dipole, dipole-quadrupole, and quadrupole-quadrupole, respectively.

**Formula S5:**

The external quantum efficiency ( $\eta_0$ ), internal quantum efficiency ( $\eta_i$ ), and absorption factor ( $\alpha_{\text{abs}}$ ) are calculated by the following formula:<sup>5</sup>

$$\eta_0 = \frac{\int L_S}{\int E_R}; \quad \eta_i = \frac{\int L_S}{\int E_R - \int E_S}; \quad \alpha_{\text{abs}} = \frac{\int E_R - \int E_S}{\int E_R} \quad (\text{S5})$$

where  $L_S$  is the PL spectrum of the sample.  $E_R$  and  $E_S$  are the PLE spectra without and with the sample, respectively.

**Formula S6:**

CP can be estimated via the following equation:<sup>6</sup>

$$\text{CP} = \frac{\sqrt{(x - x_i)^2 + (y - y_i)^2}}{\sqrt{(x_d - x_i)^2 + (y_d - y_i)^2}} \quad (\text{S6})$$

where  $x_i$  and  $y_i$  stand for the illuminant point (0.3101, 0.3162), which corresponds to the CIE 1931 Standard Source C. The color coordinates ( $x_d, y_d$ ) come from the dominant emission.

**Formula S7:**

The activation energy ( $E_a$ ) is evaluated by using the following expression:<sup>7</sup>

$$\ln(I_0/I - 1) = \ln A - E_a/kT \quad (\text{S7})$$

where  $I_0$  and  $I$  represent the integral intensities at room temperature and temperature  $T$ , respectively.  $k$  is the Boltzmann constant ( $8.62 \times 10^{-5}$  eV/K), and  $A$  presents a coefficient.

**Formula S8:**

The  $\Theta_D$  is evaluated by the following equation:<sup>8</sup>

$$(\Theta_D) = \sqrt{\frac{3h^2 T N_A}{A_i k U_{iso,i}}} \quad (\text{S8})$$

where  $A_i$  is the atomic weight of the atom,  $h$  is the Planck constant,  $k$  is the Boltzmann constant, and  $U_{iso,i}$  is the average atomic displacement parameter.

**Formula S9:**

The chromaticity shift ( $\Delta E$ ) is used to describe the chromaticity stability. It is calculated by the following formula:<sup>9</sup>

$$\Delta E = \sqrt{(u'_t - u'_0)^2 + (v'_t - v'_0)^2 + (w'_t - w'_0)^2} \quad (\text{S9})$$

where  $u' = 4x/(3 - 2x + 12y)$ ,  $v' = 9y/(3 - 2x + 12y)$ , and  $w' = 1 - u' - v'$ .

0 and  $t$  represent room temperature and given temperature, separately.

## References

- 1 J. P. Li, Y. K. Zheng, H. Z. Zhang, H. Li, T. S. Yang, Y. F. Xiang, J. Zhang, J. Zhu, *J. Solid State Chem.*, 2023, **322**, 124000.
- 2 Q. Liu, J. Guo, M. H. Fan, Q. Zhang, S. Liu, K. Wong, Z. Y. Liu, B. Wei, *J. Mater. Chem. C*, 2020, **8**, 2117–2122.
- 3 X. H. Li, B. Milic'evic', M. Dramic'anin, X. P. Jing, Q. Tang, J. X. Shi, M. M. Wu, *J. Mater. Chem. C*, 2019, **7**, 2596.
- 4 T. Sakthivel, G. Annadurai, R. Vijayakumar, X. Huang, *J. Lumin.*, 2019, **205**, 129–135.
- 5 Y. B. Hua, W. G. Ran, J. S. Yu, *Chem. Eng. J.*, 2021, **406**, 127154.
- 6 P. Dang, G. Li, X. Yun, Q. Zhang, D. Liu, H. Lian, M. Shang, J. Lin, *Light: Sci. Appl.*, 2021, **10**, 29.
- 7 Z. Guo, B. Milicevic, J. Feng, L. Zhou, F. Yao, S. Huang, Z. Wu, W. Ullah Khan, J. Shi, M. Wu, *J. Alloy. Compd.*, 2020, **837**, 155438.
- 8 K. A. Denault, J. Brgoch, S. D. Kloß, M. W. Gaultois, Joan Siewenie, K. Page, R. Seshadri, *ACS Appl. Mater. Interfaces*, 2015, **7**, 7264–7272.
- 9 Y. F. Xiang, Y. K. Zheng, L. Yang, M. Y. Li, Y. Mao, J. Zhu, *J. Alloy. Compd.*, 2022, **919**, 165837.
